# Supplementary material for: Synthesis of a BODIPY disulfonate near-infrared fluorescence-enhanced probe with high selectivity to endogenous glutathione and two-photon fluorescent turn-on through thiol-induced SNAr substitution
Source: Royal Society of Chemistry journal article supplement (doi:10.1039/c7tb03321d), 2018-01-01
Supplement: c7tb03321d1.pdf [file c7tb03321d1.pdf]

## Support information

A novel BODIPY disulfonate near-infrared fluorescence-enhanced probe: synthesis,  
high selectivity to endogenous glutathione and two-photon fluorescent turn-on  
through thiol-induced SNAr substitution

Xiang Xia, Ying Qian\*, Baoxing Shen,

School of Chemistry and Chemical Engineering, Southeast University, Nanjing,  
211189, China

\*Corresponding author E-mail address: yingqian@seu.edu.cn

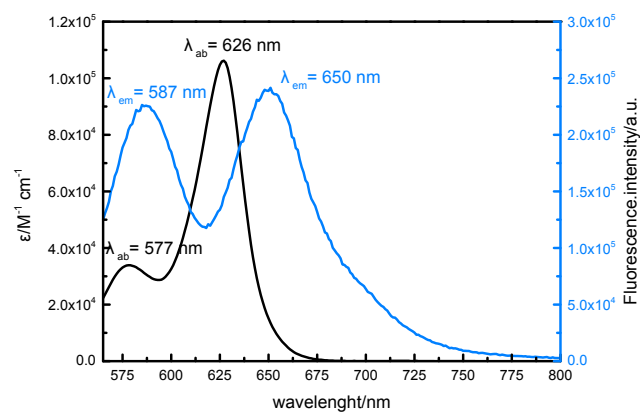

Fig. S1 The absorption (black line) and fluorescence (blue line) spectra in THF/H<sub>2</sub>O (v/v = 1:1) buffer with pH 7.4 PBS solution at a concentration of  $10^{-5}$  M.

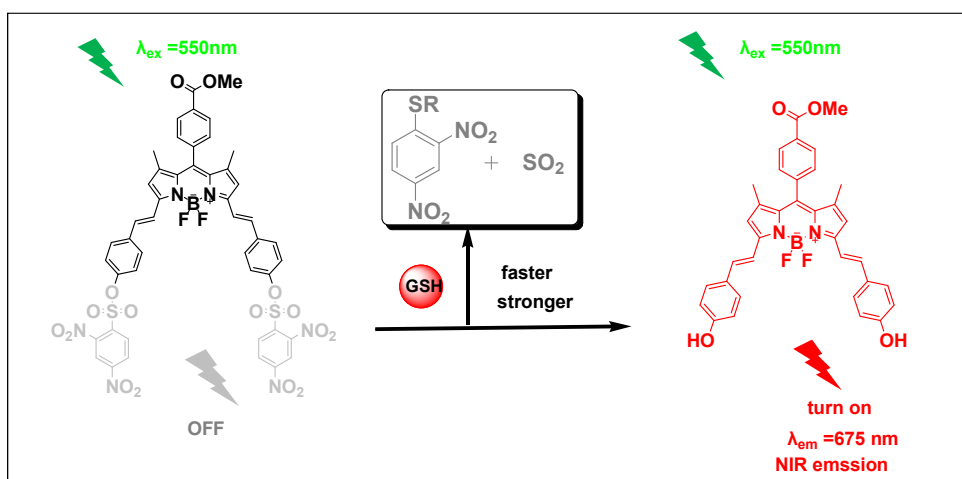

Scheme.S1 Proposed mechanism of GSH - induced nucleophilic substitution of probe

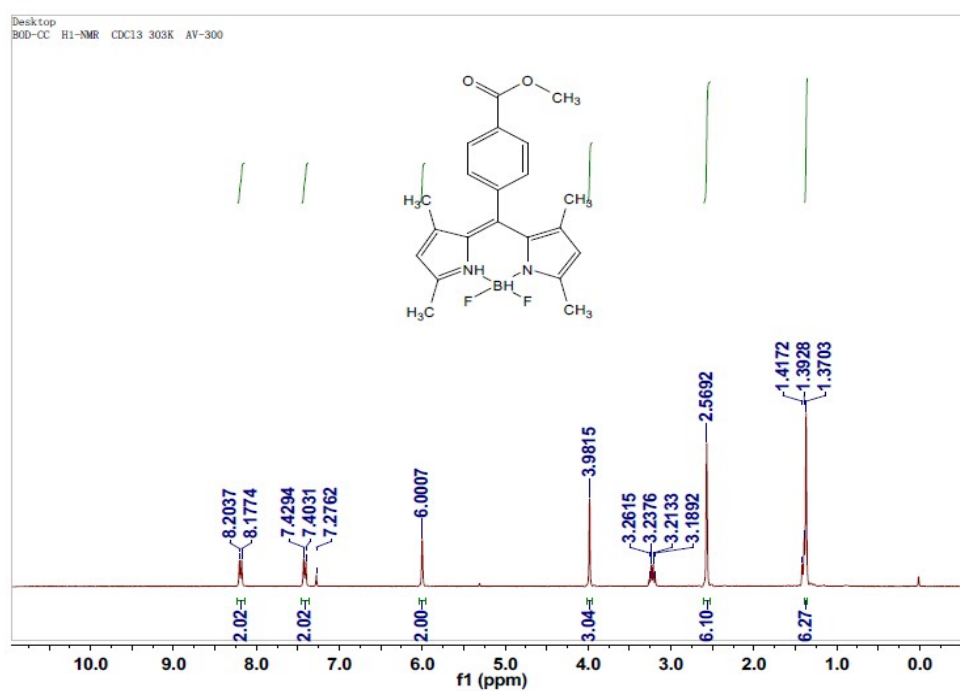

Figure S2. <sup>1</sup>H-NMR (CDCl<sub>3</sub>) spectrum of compound M1

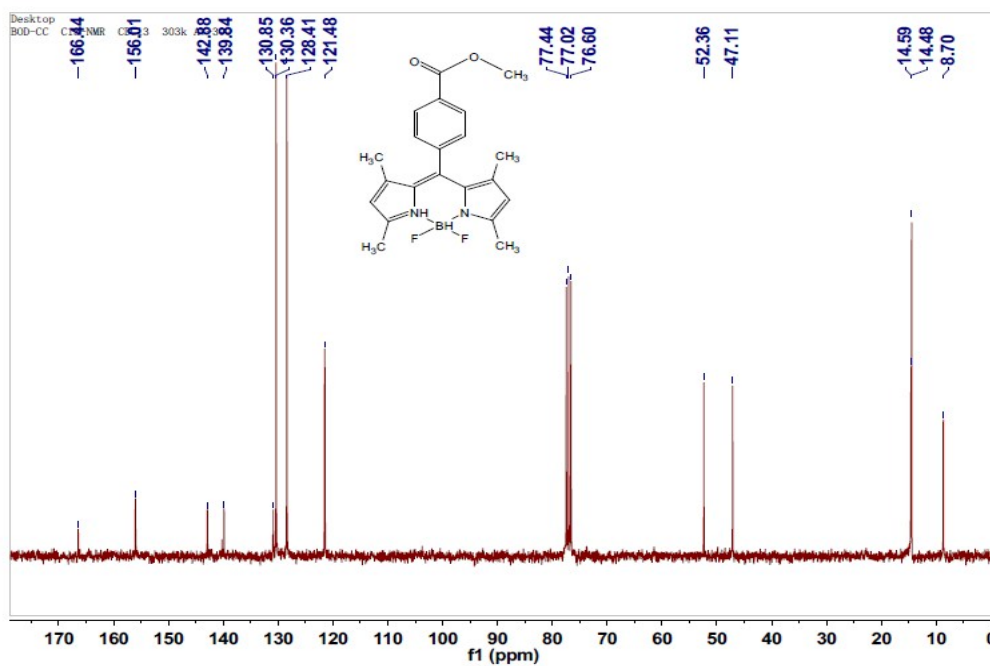

Figure S3. <sup>13</sup>C-NMR (CDCl<sub>3</sub>) spectrum of compound M1

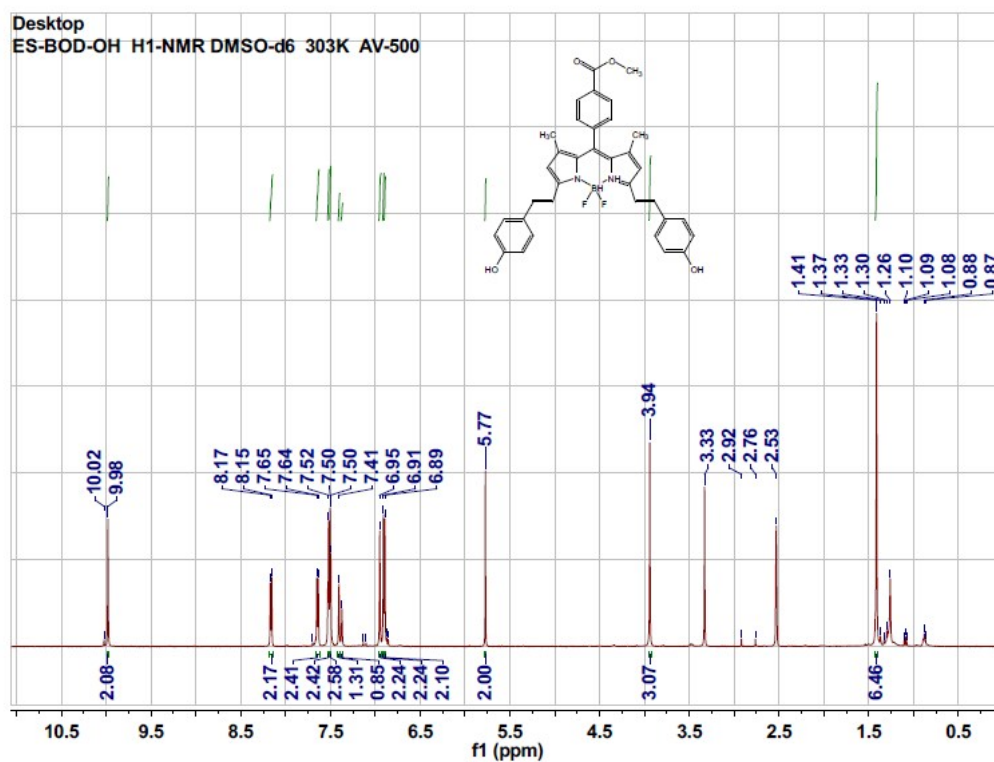

Figure S4. <sup>1</sup>H-NMR (DMSO-*d*<sub>6</sub>) spectrum of compound M2

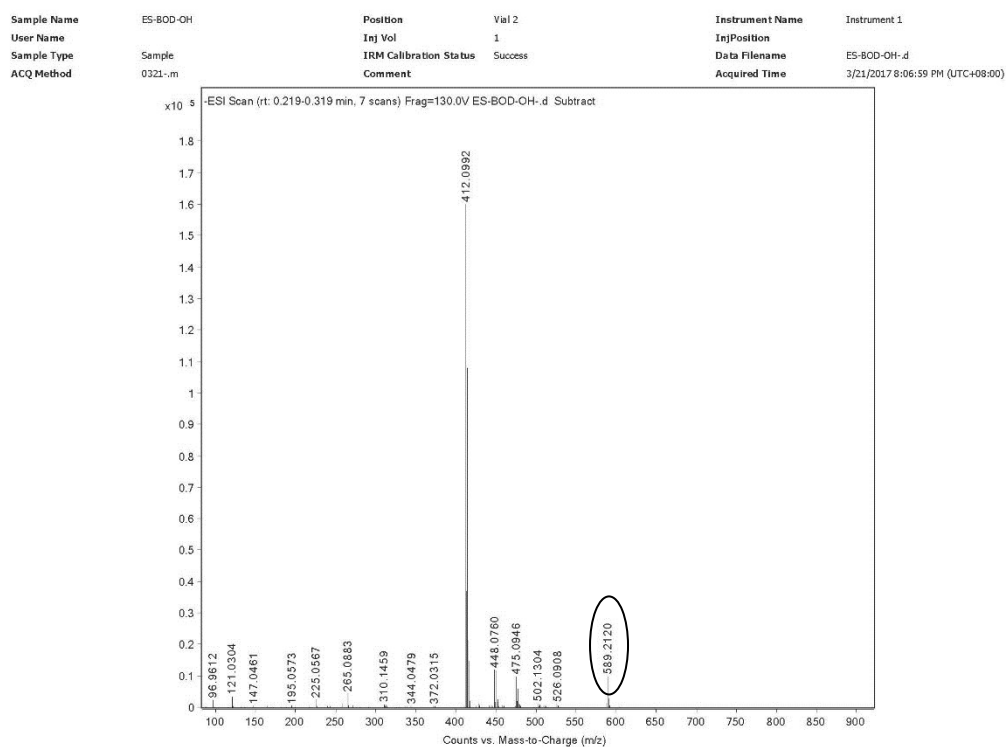

Figure S5. The MS spectrum of compound M2. The peak at  $m/z$  598.2120 corresponds to the compound  $M_2 [M-H]^-$ , as shown in the figure.

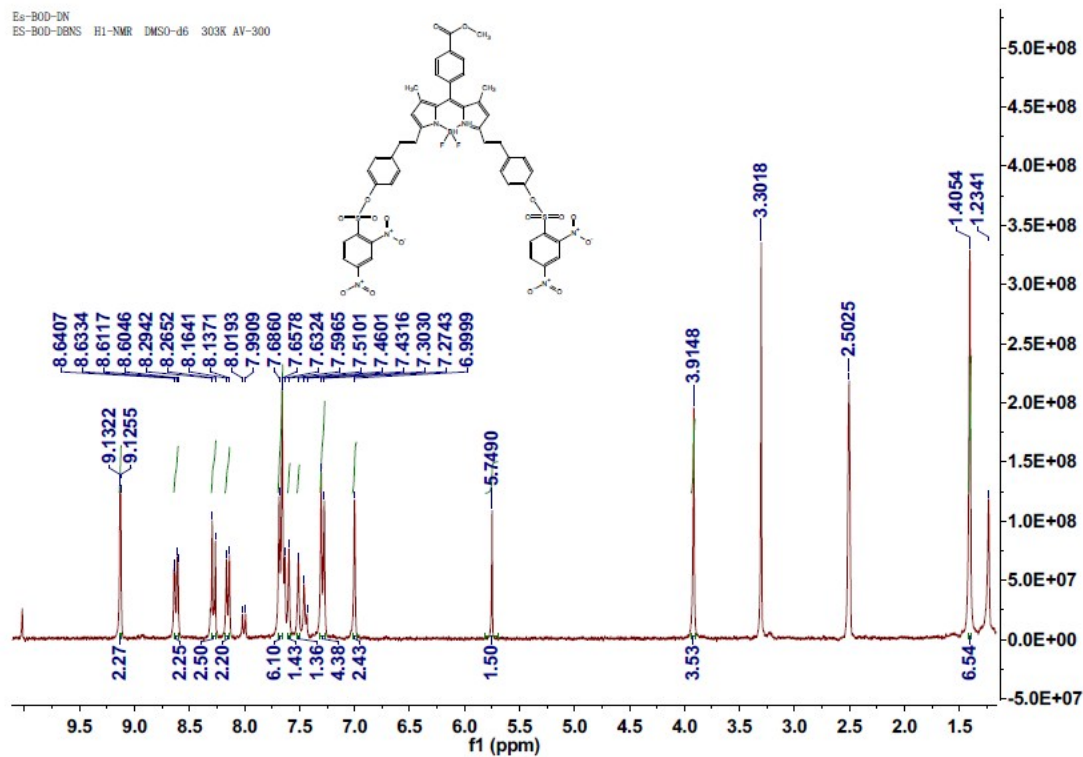

Figure S6.  $^1\text{H}$ -NMR (DMSO- $d_6$ ) spectrum of BODIPY-ONs

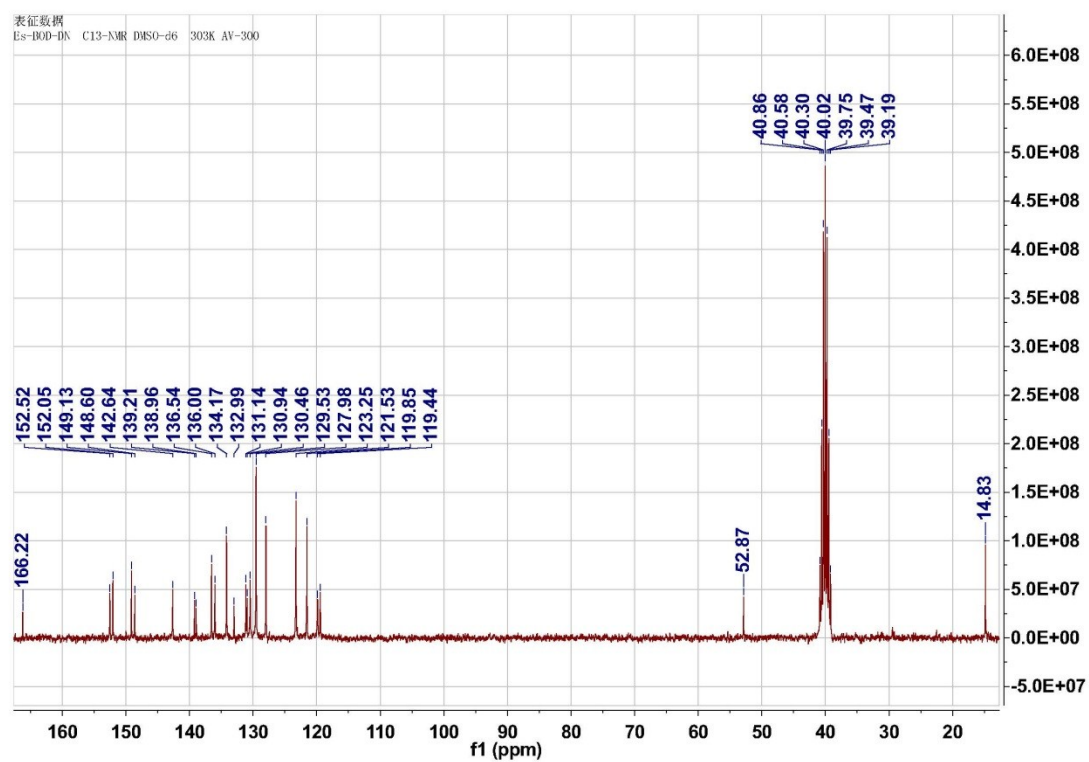

Figure S7.  $^{13}\text{C}$ -NMR (DMSO- $d_6$ ) spectrum of BODIPY-ONs
